# Supplementary material
Source: PubMed Central journal article supplement (PMC4150314)
Supplement: rspb20140811supp1.pdf [file rspb20140811supp1.pdf]

1  
2  
3  
4  
5  
6  
7  
8  
9  
10  
11  
12  
13  
14  
15  
16  
17  
18  
19  
20

**The youngest South American rhynchocephalian, a survivor of the K/Pg extinction**

Sebastián Apesteguía<sup>1</sup>, Raúl O. Gómez<sup>2</sup> and Guillermo W. Rougier<sup>3</sup>

<sup>1</sup>CONICET-Fundación de Historia Natural ‘Félix de Azara’-CEBBAD-Universidad Maimónides, Hidalgo 775, 1405 Buenos Aires, Argentina

<sup>2</sup>CONICET-Departamento de Ciencias Geológicas, Facultad de Ciencias Exactas y Naturales. Universidad de Buenos Aires, Pabellón 2, Ciudad Universitaria, 1428 Buenos Aires, Argentina

<sup>3</sup>Department of Anatomical Sciences and Neurobiology, University of Louisville, 511 S. Floyd Street, Louisville, 40292 Kentucky, U.S.A.

Correspondent author:

Sebastián Apesteguía

e-mail: [sebapesteguia@gmail.com](mailto:sebapesteguia@gmail.com)

21 **TABLE OF CONTENTS**

22

**ADDITIONAL DATA ON THE GEOLOGICAL FRAMEWORK**

**ADDITIONAL DATA ON *KAWASPHENODON PELIGRENSIS***

**Additional figures**

**Selected measurements**

**Body size**

**PHYLOGENETIC ANALYSIS**

**Taxon and character sampling**

**Heuristic tree search and results**

**Support measures**

**Character list**

**Data matrix**

**Synapomorphies**

**REFERENCES**

23

24 **ADDITIONAL DATA ON THE GEOLOGICAL FRAMEWORK**

25 The type material of *Kawasphenodon peligrensis* comes from the ‘Banco Negro  
26 Inferior’ (BNI) of the Salamanca Formation outcropping at the coastal locality of Punta  
27 Peligro, which is about 27 km North of Comodoro Rivadavia in the Chubut province,  
28 Argentina (Suppl-fig. 1). The marine or nearshore sediments of the Salamanca  
29 Formation are well exposed within the slopes of the San Jorge Basin (Feruglio, 1949;  
30 Andreis et al., 1975; Legarreta and Uliana, 1994). These epeiric deposits are the result  
31 of the widespread marine transgression known as ‘Salamanca Sea’ that extensively  
32 flooded Patagonia during Late Cretaceous–Early Palaeocene times (Andreis et al.,  
33 1975). The BNI is part of the uppermost levels (Hansen Member) of the Salamanca  
34 Formation (Andreis et al., 1975; Legarreta y Uliana, 1994), with a thickness ranging  
35 from 1 to 8 meters (Gelfo et al., 2007). It consists of a package of dark sediments,  
36 comprising massive black clays with conchoidal fracture and some irregular  
37 conglomerates, with a whitish level of tuffaceous concretions on its lower part (Andreis  
38 et al., 1975). Most of the fossil vertebrates at Punta Peligro (Gelfo et al., 2007) were  
39 collected in this horizon.

40 Punta Peligro has yielded one of the earliest known Palaeocene vertebrate faunas in  
41 South America (Bonaparte et al. 1993; Muizon 1998; Gelfo et al., 2009), the mammals  
42 were used to define the Peligran South American Land Mammal Age (SALMA;  
43 Bonaparte et al., 1993). To date the fauna includes, besides the newly described  
44 rhynchocephalian (this paper), relatively abundant remains of brackish environment  
45 including lamiid sharks, rays, abundant chelid turtles, and caimans (Bonaparte et al.,  
46 1993; de la Fuente and Bona, 2002; Páez Arango, 2008). Additionally, vertebrates that  
47 may be allochthonous have also been discovered at Punta Peligro, including  
48 calyptocephalellid frogs (some specimens reaching giant size), an undescribed sebecid

49 crocodyliform, and a mixture of non-tribosphenic (dryolestoids, gondwanatheres) and  
50 tribosphenic (monotremes, therians) mammals (Pascual et al. 1992; Bonaparte et al.,  
51 1993; Pascual, 1996, 1998; Gelfo and Pascual 2001; Páez Arango, 2008).

52 The BNI has been interpreted as deposited in a brackish environment, such as a lagoon,  
53 formed during the withdrawal of the “Salamanca Sea” (Andreis et al., 1975).

54 Palaeosoil structures have been indentified from this level and were considered  
55 evidence of aerial environments that developed under wet conditions (Andreis et al.,  
56 1975). These more continental conditions, however, could have been ephemeral, since  
57 marine deposits (rich in glauconite) overlay the BNI (Pascual and Ortiz Jaureguizar,  
58 1991; Gelfo et al., 2007).

59 The age of BNI has been regarded as early Palaeocene (Bonaparte et al., 1993; Muizon,  
60 1998), though both a precise geochronological date and the relative calibration of the  
61 Peligran SALMA (particularly with respect to the Tiupampan SALMA) have long been  
62 controversial (e.g., Marshall et al. 1981; Bonaparte et al. 1993; Somoza et al. 1995;  
63 Muizon 1998; Gelfo et al., 2009). An accurate calibration of the BNI has been  
64 attempted through radiometric dating of levels below or above the BNI, palaeomagnetic  
65 data, and their content of mammals. Radiometric dating with  $^{40}\text{K}-^{40}\text{Ar}$  of levels of the  
66 Salamanca Formation below the BNI yielded ages of  $64 \pm 0.8$ ,  $62.8 \pm 0.8$ , and  $62.5 \pm 5$   
67 Ma (Marshall et al. 1981; Marshall, 1982). The only radiometric date available from  
68 levels above the BNI is from a  $^{40}\text{Ar}-^{39}\text{Ar}$  analysis that dated a tuff horizon located 40 m  
69 above the BNI at Palacio de los Loros locality (Suppl-fig. 1), about 100 km West of  
70 Punta Peligro, as  $57.80 \pm 6.00$  Ma (Iglesias et al., 2007). Based on paleomagnetic data,  
71 the BNI was correlated with Chron 26r (between 59.2 and 62.2 Ma; Gradstein et al.,  
72 2012) at Punta Peligro and the area of Cerro Redondo (Marshall et al. 1981; Suppl-fig.  
73 1), but with Chron 27n (between 62.2 and 62.5 Ma; Gradstein et al., 2012) at the El

74 Gauchito and Las Violetas farms (Suppl-fig. 1), farther North of Punta Peligro (Somoza  
75 et al. 1995). This regional asynchrony has been interpreted as related to the retreat of the  
76 ‘Salamancan Sea’ (Somoza et al. 1995), though other authors attribute this putative  
77 diachronism to methodological errors (Bonaparte et al., 1993).

78 The relative age of the BNI based on paleontological data has also been debated, but  
79 always considered to be restricted to the Danian–Selandian interval. This way, the fauna  
80 from BNI at Punta Peligro (Peligran SALMA sensu Bonaparte et al., 1993) has  
81 alternatively been regarded as contemporary of the Tiupampan SALMA (Pascual and  
82 Ortiz Jaureguizar, 1990), between the older Tiupampan SALMA and the younger  
83 Itaboraian SALMA (Bonaparte et al., 1993; Gelfo et al., 2007, 2009), or even older than  
84 the Tiupampan SALMA (Marshall et al., 1997).

85

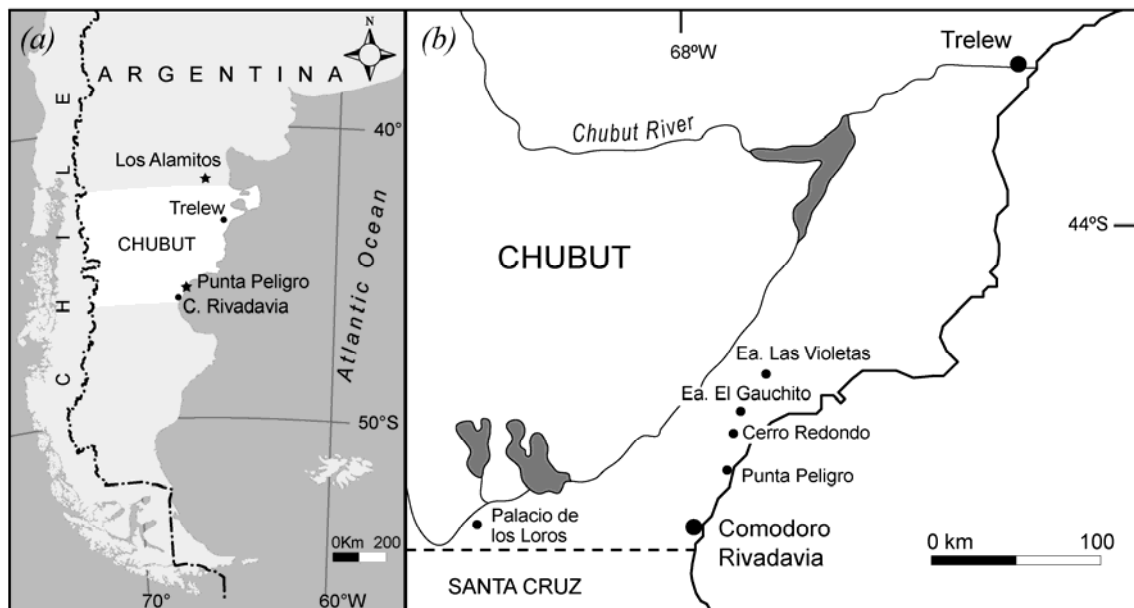

86

87 **Suppl-fig. 1:** (a) Map of Patagonia, Argentina, showing the localities of Punta Peligro  
88 and Los Alamitos. (b) Map of south-eastern Chubut province showing the location of  
89 different BNI localities named in the text.

90 **ADDITIONAL DATA ON *KAWASPENODON PELIGRENSIS* SP. NOV.**

91 **Additional figures**

92

93

94

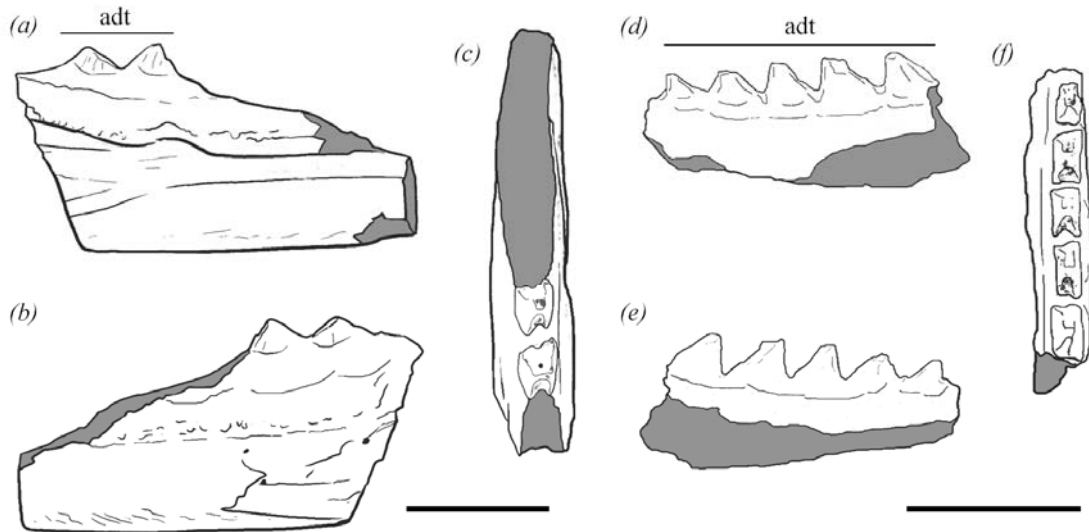

95

96 **Suppl-fig. 2:** *Kawasphenodon peligrensis* sp. nov. (a–c) Drawings of Holotype MPEF  
97 PV 1989. Left lower jaw in lingual (a), labial (b) and occlusal (c) views. (d–f) Drawings  
98 of Paratype MPEF PV 1990. Right lower jaw in lingual (d), labial (e) and occlusal (f)  
99 views. Abbreviations: adt, additional teeth. Scale bars: 5 mm.

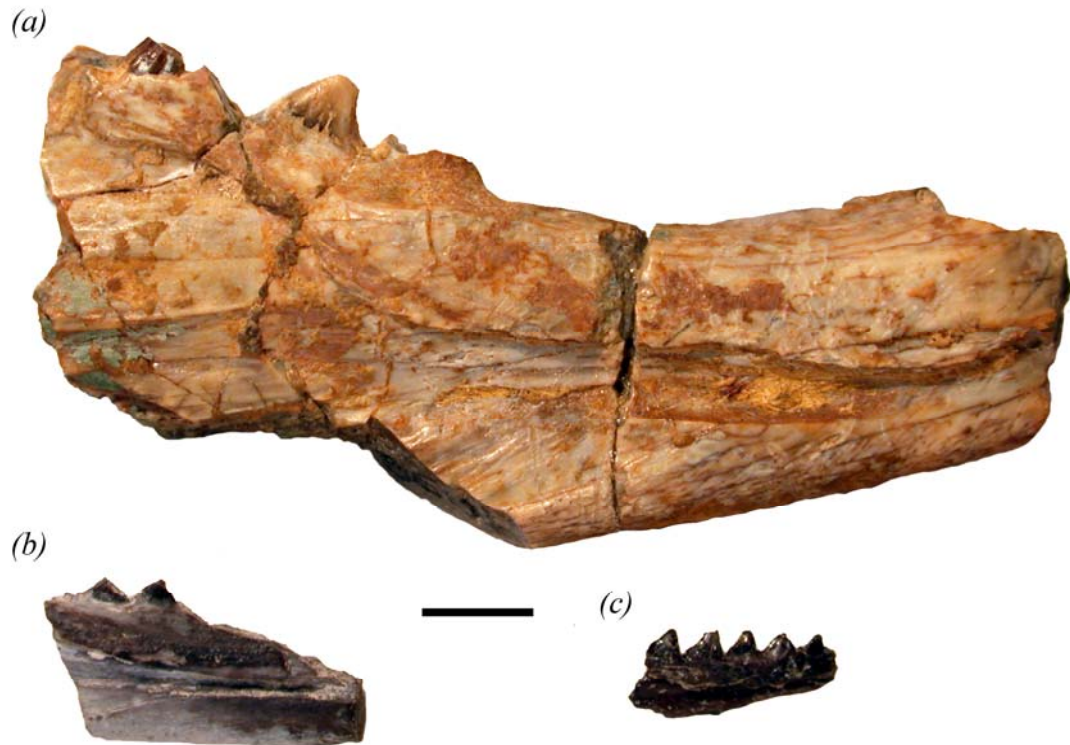

100

101 **Suppl-fig. 3:** (a) *Kawasphenodon expectatus*, holotype MACN Pv RN1098 in lingual  
 102 view. (b) *Kawasphenodon peligrensis* sp. nov., holotype MPEF PV 1989 in lingual  
 103 view. (c) *Kawasphenodon peligrensis* sp. nov., paratype MPEF PV 1990 in labial view.  
 104 All specimens are set to the same scale for size comparison. Scale bar: 5 mm.

105

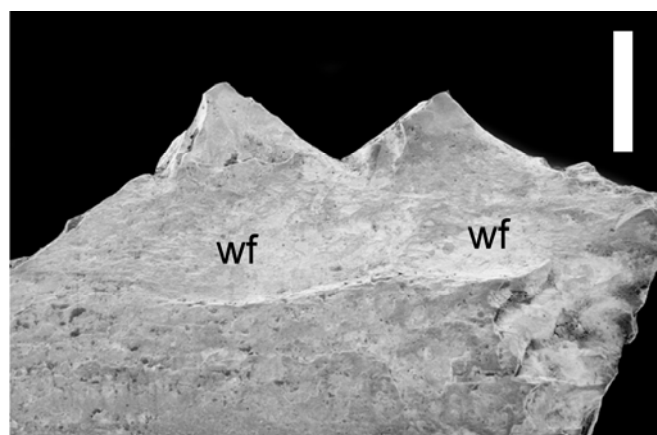

106

107 **Suppl-fig. 4:** Scanning electron micrograph of *Kawasphenodon peligrensis* sp. nov.,  
 108 holotype MPEF PV 1989 showing wear facets (wf) on the secondary bone in labial  
 109 view. Scale bar: 1 mm.

110 **Selected measurements**

111 **Suppl-table 1:** Selected measurements of the holotype and paratype of *Kawasphenodon*

112 *peligrensis* sp. nov. in comparison to those of the holotype of *K. expectatus*.

| select measurements (in mm)*                                                        | <i>K. peligrensis</i><br>MPEF PV 1989 | <i>K. peligrensis</i><br>MPEF PV 1990 | <i>K. expectatus</i><br>MACN Pv RN1098 |
|-------------------------------------------------------------------------------------|---------------------------------------|---------------------------------------|----------------------------------------|
| Maximum width of most posterior well-preserved tooth                                | 1.4                                   | 1.1                                   | 4.2                                    |
| Maximum length of most posterior well-preserved tooth                               | 2.3                                   | 1.8                                   | 5.5                                    |
| Maximum height of most posterior well-preserved tooth                               | 1.4                                   | 1.3                                   | 4.0                                    |
| Maximum height of dentary anterior to coronoid process                              | 6.4                                   | -                                     | 23.0**                                 |
| Height of dentary at anterior boundary of angular facet                             | 6.1                                   | -                                     | 13.6                                   |
| Height of dentary ventral to Meckelian groove at anterior boundary of angular facet | 2.2                                   | -                                     | 4.3                                    |
| Height of Meckelian groove at anterior boundary of angular facet                    | 1.0                                   | -                                     | 3.5                                    |
| Maximum length of the preserved portion of bone                                     | 14.9                                  | 9.5                                   | 47.1                                   |

113

114 \*The measurements were taken digitally in Adobe Photoshop CS.

115 \*\* estimated

116



117 **Body size**

118 In order to estimate the size of fossil taxa we used part of the dataset of Wiens et al.  
119 (2006), of which we eliminated those squamate taxa that are limbless or have reduced  
120 limbs. Head length was regressed on snout-vent length (SVL, a proxy of total size)  
121 using a log-log reduced major axis (RMA) regression in the statistical package PAST  
122 (Hammer et al., 2001). Then, with the slope (0.939) and intercept (0.91192) of the  
123 regression we used the skull length of fossils (a proxy of the head length; Suppl-table 2)  
124 to estimate their SVL. In the case of those fossils in which the entire skull is not  
125 preserved (e.g., *Kawasphenodon peligrensis*), we either relied on published restorations  
126 or estimated the skull length using a related taxon with known skull length as a  
127 template. Particularly, in the case of *Kawasphenodon peligrensis* we digitally matched  
128 both the holotype and paratype with those parts of the dentaries of *Opisthias rarus* and  
129 *Sphenodon punctatus* that minimizes the differences between specimens and then  
130 estimated the jaw and skull lengths. These estimations were used to represent the size of  
131 fossil taxa by black silhouettes in figure 2.

132 Additionally, to test the hypothesis that *K. peligrensis* constitutes a case of dwarfism  
133 within Opisthodontia, the estimated body size was optimized in the topology recovered  
134 by the phylogenetic analysis as a continuous character (Suppl-fig. 5) using squared  
135 parsimony in Mesquite (Maddison and Maddison, 2011).

136

137

138 **Suppl-table 2:** Skull length (SkL) of fossils and estimated SVL, using the function log

139  $SVL = \log SkL * 0.939 + 0.91192$ .

| measurements (in mm)*                | SkL   | SVL** |
|--------------------------------------|-------|-------|
| <i>K. peligrensis</i> MPEF PV 1989   | 38**  | 248   |
| <i>K. peligrensis</i> MPEF PV 1990   | 37**  | 242   |
| <i>K. expectatus</i> MACN Pv RN1098  | 110** | 674   |
| <i>Ankylosphenodon</i>               | 83    | 517   |
| <i>Brachyrhinodon</i>                | 23    | 155   |
| <i>Clevosaurus hudsoni</i>           | 39    | 254   |
| <i>Cynosphenodon</i>                 | 29    | 192   |
| <i>Diphydontosaurus</i>              | 15    | 103   |
| <i>Eilenodon</i>                     | 109   | 668   |
| <i>Gephyrosaurus</i>                 | 30    | 199   |
| <i>Godavarisaurus</i>                | 15**  | 103   |
| <i>Homoeosaurus maximilliani</i>     | 24    | 161   |
| <i>Homoeosaurus cf. maximilliani</i> | 24    | 161   |
| <i>Kallimodon pulchellus</i>         | 30    | 199   |
| <i>Kallimodon cerinensis</i>         | 38    | 248   |
| <i>Opisthias rarus</i>               | 42    | 272   |
| <i>Palaeopleurosaurus</i>            | 57    | 363   |
| <i>Pamizinsaurus</i>                 | 16    | 110   |
| <i>Planocephalosaurus</i>            | 20    | 136   |
| <i>Pleurosaurus goldfussi</i>        | 82    | 511   |
| <i>Pleurosaurus ginsburgi</i>        | 76    | 476   |
| <i>Priosphenodon avelasi</i>         | 150   | 902   |
| <i>Rebbanasaurus</i>                 | 15**  | 103   |
| <i>Sapheosaurus</i>                  | 41    | 266   |
| <i>Sphenocondor</i>                  | 28**  | 186   |
| <i>Sphenovipera</i>                  | 21**  | 142   |
| <i>Theretairus</i>                   | 20**  | 136   |
| <i>Toxolophosaurus</i>               | 60    | 381   |
| <i>Youngina</i>                      | 75    | 470   |
| <i>Zapatadon</i>                     | 12    | 84    |

140

141 \*The measurements were taken digitally in Adobe Photoshop CS.

142 \*\* estimated

143

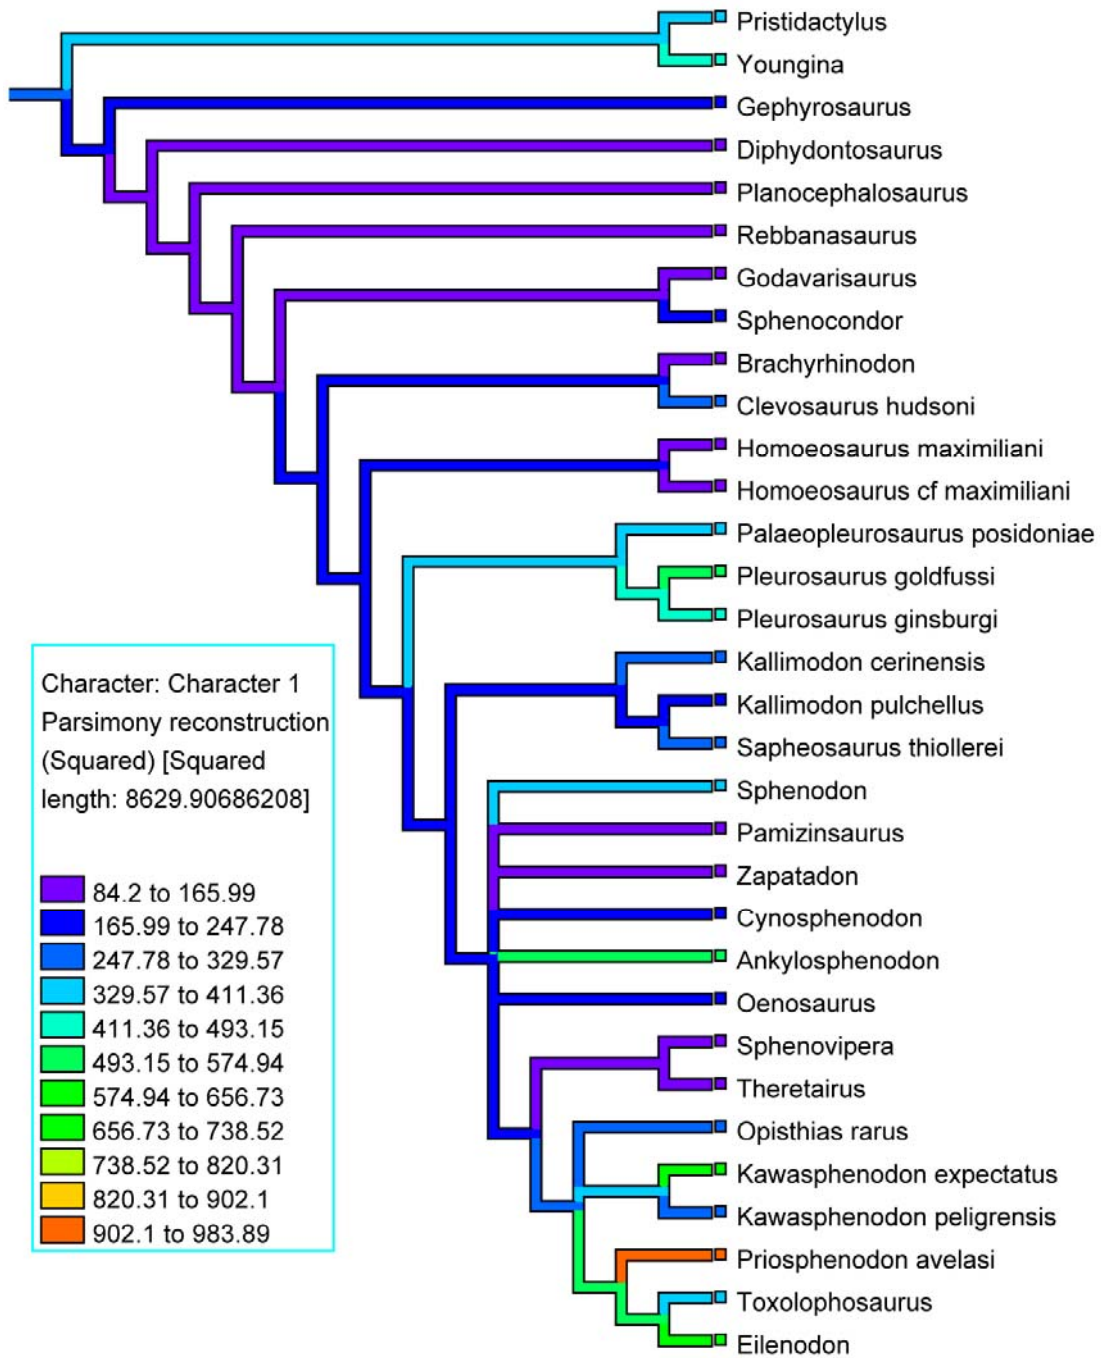

144

145 **Suppl-fig. 5:** Mapping of body size estimates onto the Rhynchocephalian phylogeny.

146

## PHYLOGENETIC ANALYSIS

147

148

### 149 **Taxon and character sampling**

150 In order to assess the evolutionary relationships of *Kawasphenodon peligrensis* sp. nov.

151 we added it to a modified version of a recently published data matrix of

152 rhynchocephalians (Apesteguía et al., 2012). The modifications involved both the

153 addition of taxa, characters, and character states, but also included changes in the

154 scoring of terminals or the character statements.

155 Regarding the taxon sampling, we added to the dataset of Apesteguía et al. (2012)

156 species of *Pleurosaurus* (*P. goldfussi* and *P. ginsburgi*) and the recently described

157 *Oenosaurus muehlheimensis* (Rauhut et al., 2012). Additionally, we aimed to be more

158 explicit in the way some terminals were scored and therefore we used species, or even

159 specimens, as terminals; this was particularly significant for the scoring of

160 *Homeosaurus*, *Kallimodon*, and *Opisthias*. In total, including *K. peligrensis*, six new

161 terminals were added to the data matrix of Apesteguía et al. (2012).

162 With respect to the characters, 68 of the 74 used in the analysis were previously

163 considered by Apesteguía et al. (2012). Four characters of the latter, mainly regarding

164 skull and body proportions, were removed for non independence issues. In addition, six

165 new characters concerning shape of the humerus (ch. 62, 63), tooth morphology (ch. 71,

166 72), and shape of maxilla (ch. 73, 74) were incorporated to the data matrix. Also, some

167 character states were added in order to include observed variation within the taxon

168 sample.

169

170 **Heuristic tree search and results**

171 We performed a heuristic search in TNT v.1.1 (Goloboff et al., 2008) using Maximum  
172 Parsimony as optimality criterion and under equal weights. The tree search consisted of  
173 500 replicates of Wagner trees with random addition sequence of taxa followed by Tree  
174 Bisection and Reconnection (TBR) branch swapping, holding ten trees per replication,  
175 and collapsing branches of zero length after tree search following rule 1 of Coddington  
176 and Scharff (1994). Multistate characters were treated as unordered during the tree  
177 search. Most-parsimonious trees (MPTs) were rooted with the distantly related diapsid  
178 *Youngina*.

179 The analysis yielded 22 MPTs of 218 steps, in all of which *K. peligrensis* appears as  
180 sister-group of *K. expectatus* (Suppl-fig. 6). The strict consensus of these MPTs is  
181 relatively well resolved, with the exception of the node including all ‘eupropalinals’. It  
182 is noteworthy that this node, as the three nodes immediately below it, has low support  
183 values. The uncertainties mainly involve the interrelationships between *Homeosaurus*,  
184 pleurosaurs, sappeosaurs, and some eupropalinal taxa within crown-sphenodontians.  
185 Despite this ambiguity, the results reflect previous phylogenetic hypothesis of  
186 rhynchocephalians (e.g., Reynoso, 1996, 2005; Apesteguía and Novas, 2003;  
187 Apesteguía et al., 2012). The main previously recognized groups were consistently  
188 recovered, including Sphenodontia (sensu Benton, 1985), ‘derived sphenodontians’  
189 (sensu Apesteguía et al., 2012), and Opisthodontia (sensu Apesteguía and Novas, 2003),  
190 as well as clades of clevoosaurs, pleurosaurs, sappeosaurs, and eilenodontines.  
191 Additionally, a clade of eupropalinal forms was recovered (previously recognized by  
192 Apesteguía and Carballido, in press), although it has low support (Suppl-fig. 6).  
193 In agreement with previous hypotheses (Apesteguía and Rougier, 2007, Apesteguía et  
194 al., 2012), *Kawasphenodon* is related to opisthodontians, recovered in a polytomy with

195 *Opisthias rarus* and eilenodontines. Opisthodontians, including *Kawasphenodon*, share  
 196 the presence of additionalals that are square to transversely rectangular in cross section  
 197 and moderately to tightly packed in the jaw, moving in a prooral fashion (see below for  
 198 a list of synapomorphies for all the nodes).  
 199

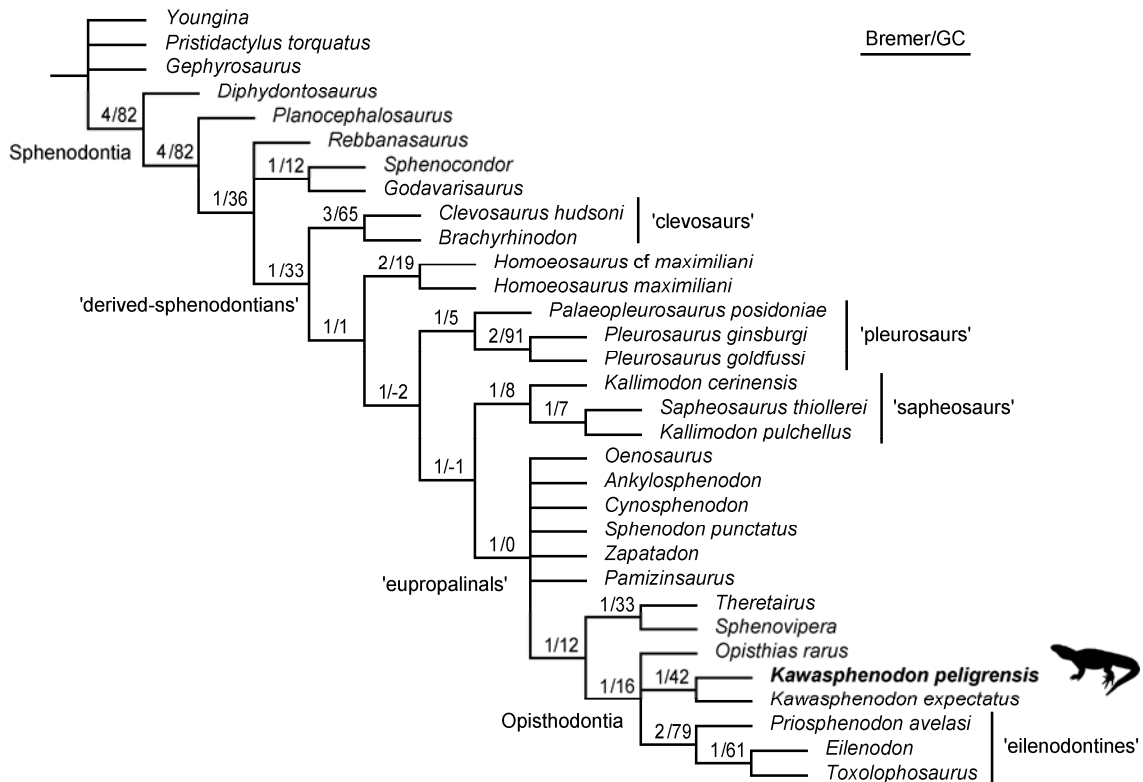

200

201 **Suppl-fig. 6:** Strict consensus of 22 MPTs obtained in the phylogenetic analysis

202 depicting the position of *Kawasphenodon peligrensis* sp. nov. Node support

203 (Bremer/GC) is shown above branches.

204

205 **Support measures**

206 Node support was assessed by 1000 rounds of symmetric resampling and expressed as

207 frequency difference (GC) values (Goloboff et al., 2003).and by calculating the Bremer

208 index in TNT.

209

210 **Character list**

211 Description of 74 characters used in the phylogenetic analyses, 68 of which are the  
212 same used by Apesteguía et al. (2012), although some of them were modified (denoted  
213 with an asterisk). Four characters of the latter were removed because of non  
214 independence issues. Between brackets the original source of each character is  
215 indicated. Also, six new characters regarding shape of the humerus (ch. 62, 63), tooth  
216 morphology (ch. 71, 72), and shape of maxilla (ch. 73, 74) were added. Multistate  
217 characters were treated as unordered. Abbreviations: AGR12, Apesteguía et al. (2012);  
218 AN03, Apesteguía & Novas (2003); B85, Benton (1985); E88, Evans (1988); FB89,  
219 Fraser & Benton (1989); G88, Gauthier et al. (1988); R96, Reynoso (1996); R97,  
220 Reynoso (1997); RC98, Reynoso & Clark (1998); S94, Sues et al. (1994); W94, Wu  
221 (1994).

222

223 (1) Antorbital region, length relative to skull length: one-third or more (0); between  
224 one-fourth and one-third (1); one fourth or less (2). (S94, W94, R96, AN03)

225 (2) Orbit, length relative to skull length: one third or greater (0); less than one third  
226 (1). (RC98, AN03)

227 (3) Supratemporal fenestra, length relative to orbit length: less than 75% (0); 75% or  
228 greater (1). (S94, AN03)

229 (4) Supratemporal fenestra, length relative to skull length: one-fourth or less (0);  
230 more than one-fourth (1). (W94, R96, AN03)

231 (5) Lower temporal fenestra, length relative to skull length: one-fourth or less (0) ;  
232 more than one-fourth (1). (W94, R96, AN03)

233 (6) Maxilla, premaxillary process: elongate (0); reduced (1). (S94, W94, R96, AN03)

- 234 (7) Maxilla, participation in margin of external naris: entering into margin (0);  
235 excluded from margin by posterodorsal process of premaxilla (1). (S94, R97,  
236 AN03)
- 237 (8) Maxilla, shape of posterior end: tapering posteriorly or very narrow (0);  
238 dorsoventrally broad (1). (W94, R96, AN03)
- 239 (9) Lacrimal: present (0); absent (1). (S94, W94, R96, AN03)
- 240 (10) Jugal, shape of dorsal process: broad and short (0); narrow and elongate (1).  
241 (W94, R96, AN03)
- 242 (11) Prefrontal and postfrontal, profuse sculpture on bone surface: absent (0); present  
243 (1). (AN03)
- 244 (12) Prefrontal-jugal contact: absent (0); present (1). (S94, R97, AN03)
- 245 (13) Postorbital, marked dorsal ridge and deep ventrolateral concavity: absent (0);  
246 present (1). (AN03)
- 247 (14) Frontals, relation: separated (0); fused (1). (S94, W94, R96, AN03)
- 248 (15) Parietals, relation: separated (0); fused (1). (S94, W94, R96, AN03)
- 249 (16) Parietal, width between supratemporal passages relative to interorbital width:  
250 broader (0); narrower (1). (S94, W94, R96, AN03)
- 251 (17) Parietal crest: absent (0); present (1). (S94, W94, R96, AN03)
- 252 (18) Parietal, shape of posterior edge: greatly incurved inward (0); slightly incurved  
253 inward (1); convex (2). (W94, R96, AN03)
- 254 (19) Parietal foramen, position relative to anterior border of supratemporal fenestra:  
255 posterior (0); at the same level or anterior (1). (S94, W94, R96, AN03)
- 256 (20) Lower temporal bar, position: aligned with the maxillary tooth row (0); bowed  
257 away beyond the limit of the abductor chamber (1). (S94, W94, R96, AN03)



- 258 (21) Lower temporal bar, posteroventral process of jugal: absent (0); poorly- to  
259 moderately-developed, less than half the length of the lower temporal fenestra (1);  
260 well-developed, half the length of the lower temporal fenestra or more (2). (S94,  
261 W94, R96, AN03)
- 262 (22) Palatine, shape of posterior end: tapers posteriorly (0); widens posteriorly (1).  
263 (S94, W94, R96, AN03)
- 264 (23) Pterygoids, anterior contact between bones\*: absent (0); small (1); broad (2).  
265 (R97, AN03)
- 266 (24) Pterygoids, posterior opening of the interpterygoid vacuity between posteromedial  
267 processes: widely open (0); moderately open, as wide as the vacuity (1); almost  
268 closed by the posteromedial processes (2). (R97, AN03)
- 269 (25) Pterygoid, central region between three rami: short (0); elongate (1). (S94, W94,  
270 R96, AN03)
- 271 (26) Pterygoid, participation in margin of suborbital fenestra: form part of the margin  
272 (0); excluded from margin (1). (S94, W94, R96, AN03)
- 273 (27) Quadrate-quadratojugal foramen, relative size: small (0); large (1). (RC98, AN03)
- 274 (28) Quadrate-quadratojugal foramen, location: between the quadrate and the  
275 quadratojugal (0); entirely within the quadrate (1). (RC98, AN03)
- 276 (29) Quadrate-quadratojugal emargination, shape: pronounced (0); reduced (1). (E88,  
277 S94, W94, RC98, AN03)
- 278 (30) Supratemporal, as a discrete bone: present (0); absent (1). (S94, R97, AN03)
- 279 (31) Inferred jaw motion: orthal (0); propalinal (1). (S94, W94, R96, AN03)
- 280 (32) Degree of propalinality, measured either as palatal tooth row extension or length  
281 in which palatines keep parallel to the maxillae: small palatal row, parallel line  
282 restricted to the anterior region (0); enlarged, palatines accompanying maxilla half

- 283 its own length (1); palatines accompanying maxilla by its complete length,  
284 'eupropalinality' (2). (S94, W94, R96, AN03)
- 285 (33) Mandibular symphysis, mentonian process\*: absent (0); reduced (1); well-  
286 developed and pointed (2); well-developed and rounded (3). (AN03)
- 287 (34) Mandibular symphysis, shape: almost circular, high/length relation near one (0);  
288 oval, high/length clearly greater than one (1). (B85, R96, AN03)
- 289 (35) Mandibular symphysis, angle between anterior margin and longitudinal axis of the  
290 mandible in lateral view:  $<120^\circ$ , symphysis nearly vertical, typically devoid of  
291 ventral projections (0);  $\geq 120^\circ$ , symphysis anterodorsally projected (1). (AN03)
- 292 (36) Mandibular symphysis, symphyseal spur: absent (0); well-developed,  
293 anterodorsally projected (1); moderately developed (2). (AN03)
- 294 (37) Mandibular foramen, relative size: small (0); large (1). (B85, R96, AN03)
- 295 (38) Glenoid cavity, shape: smooth surface, lacking an anteroposterior central ridge  
296 (0); elongate and asymmetrical surface, with a strong anteroposterior central ridge  
297 (1); symmetrical facet with a strong anteroposterior central ridge (2). (AN03)
- 298 (39) Coronoid process, height relative to that of the jaw at the level of the anterior end  
299 of the coronoid process: low, weak, less than half the jaw (0); high, equal or more  
300 than half the jaw height (1). (S94, W94, R96, AN03)
- 301 (40) Retroarticular process, shape: pronounced (0); reduced, caudally projected (1);  
302 reduced, dorsally curved (2). (S94, W94, R96, AN03)
- 303 (41) Dentary, posterior process, relative length: short, not reaching glenoid level (0);  
304 elongate, reaching glenoid level (1); elongate, reaching the end of glenoid level  
305 (2). (S94, R97, AN03)
- 306 (42) Marginal dental implantation, type: pleurodont (0); degree of posterior acrodonty  
307 (1); fully acrodont (2). (S94, W94, R96, AN03)

- 308 (43) Tooth replacement, type: alternate (0); addition at back of jaw (1). (B85, R96,  
309 AN03)
- 310 (44) Dentary regionalization with small juvenile teeth (hatchling) in the anterior region  
311 of maxilla and dentary: absent, only pleurodont teeth (0); present, with hatchling  
312 pleurodont teeth (1); present, with hatchling, successional and additional acrodont  
313 teeth (2); absent both in juveniles and adults, only additional acrodont teeth (3).  
314 (B85, R96, AN03)
- 315 (45) Dentary, posterior successional, number in mature individuals: zero (0); one (1);  
316 two or more (2). (G88, R96, AN03)
- 317 (46) Marginal teeth, lateral wear facets on dentary and/or medial wear facets on  
318 maxilla: absent or smooth (0); present, conspicuous (1). (S94, W94, R96, AN03)
- 319 (47) Marginal teeth, shape of cross section of posterior teeth: nearly circular (0);  
320 squared (1); rectangular, wider than long (2). (FB89, R96, AN03)
- 321 (48) Premaxillary teeth, number in mature individuals: more than seven (0); seven to  
322 four (1); three or less (2). (S94, W94, R96, AN03)
- 323 (49) Premaxillary teeth, general organization in adults: present as discrete teeth (0);  
324 merged into a chissel-like structure (1). (S94, W94, R96, AN03)
- 325 (50) Maxillary teeth, posteromedial flanges on posterior teeth: absent or inconspicuous  
326 (0); present as small flanges on at least one tooth (1); present as extensive flanges  
327 on most teeth (2). (S94, W94, R96, AN03)
- 328 (51) Maxillary teeth, anterolateral flange on posterior teeth: absent (0); present (1).  
329 (AN03)
- 330 (52) Palatine teeth, number of tooth rows: two or more (0); a single row plus one  
331 isolated tooth (1); a single lateral row (2). (S94, W94, R96, AN03)

- 332 (53) Palatine teeth, flanges: completely absent (0); present at least on a few teeth (1).  
333 (FB89, R96, AN03)
- 334 (54) Palatine teeth, hypertrophied tooth on anterior region of the palatine bone  
335 (stabbing palatine): absent (0); present (1). (AN03)
- 336 (55) Pterygoid teeth, number of tooth rows\*: three or more (0); two (1); one or none  
337 (2); radial crests (3). (S94, W94, R96, AN03)
- 338 (56) Mandibular teeth, anterolateral flanges: absent (0); present, at least in one tooth  
339 (1). (S94, W94, R96, AN03)
- 340 (57) Mandibular teeth, anteromedial flanges: absent (0); present (1). (AN03)
- 341 (58) Mandibular teeth, additional, enamel ornamentation in adults\*: absent (0);  
342 present, with numerous fine striae (1); present, with a combination of a few striae  
343 and wide grooves (2). (AN03)
- 344 (59) Second sacral vertebra, posterior process: absent (0); present, small (1); present,  
345 prominent (2). (G88, R96, AN03)
- 346 (60) Ischium, process on posterior border: absent (0); present as small tubercle (1);  
347 present as prominent process (2). (E88, FB89, R96, AN03)
- 348 (61) Humerus, length relative to length of presacral column\*: <0.12 (0); between 0.12  
349 and 0.21 (1); > 0.21. (FB89, R96, AN03)
- 350 (62) Humerus, shape, relation between minimum width of the diaphysis (DW) and  
351 maximum length of bone (HL):  $DW/HL \leq 0.11$  (0);  $DW/HL > 0.11$  (1).
- 352 (63) Humerus, shape, relation between minimum width of the diaphysis (DW) and  
353 maximum width of distal epiphysis (EW):  $DW/EW < 0.28$  (0);  $DW/EW$  between  
354 0.28–0.35 (1),  $DW/EW > 0.35$  (2).

- 355 (64) Dentary, proportions (pre-coronoid length/ maximum pre-coronoid height ratio,  
356 L/H): gracile, long and low,  $L/H < 0.18$  (0); average,  $L/H$  between 0.18–0.28 (1),  
357 robust, short and high,  $L/H > 0.28$  (2). (AGR12)
- 358 (65) Dentary, successional teeth, maximum concurrent number during ontogeny: six or  
359 more (0); three to five (1); two or less (2). (AGR12)
- 360 (66) Dentary, anterior successional teeth (not ‘caniniform’), number in the adult: two  
361 or more clearly discrete teeth (0); one or two poorly distinct (1); none or indistinct  
362 (2). (AGR12)
- 363 (67) Dentary, successional teeth, striation: present (0); absent (1). (AGR12)
- 364 (68) Dentary, posterior successional teeth, lingual groove: absent (0); present (1).  
365 (AGR12)
- 366 (69) Dentary, hatchling teeth, striation: absent (0); present (1). (AGR12)
- 367 (70) Dentary, successional ‘caniniform’ teeth, shape of basal cross section: nearly  
368 circular (0); clearly oval, labio-lingually compressed (1). (AGR12)
- 369 (71) Mandibular teeth, additional, grooves or fossae on labial or lingual sides: absent  
370 (0); present (1).
- 371 (72) Mandibular teeth, additional, posterior groove: absent (0); wide and poorly-  
372 defined (1); relatively deep and well-defined (2).
- 373 (73) Maxilla, facial process, shape of anterior margin relative to main axis of maxilla:  
374 low slope, straight or concave (0); high slope, in straight angle (1); high slope,  
375 continuous and concave (2); high slope, continuous and convex (3).
- 376 (74) Maxilla, facial process, maximum high (FH) with respect to length of maxilla  
377 posterior to this point (MPL):  $FH/MPL < 0.45$  (0);  $FH/MPL$  between 0.45–0.7  
378 (1);  $FH/MPL > 0.7$  (2).
- 379

380 **Data matrix**

381 Data matrix of 74 characters scored for 32 taxa used in the phylogenetic analysis.

382 Symbols: ?, missing data or not applicable; A=0/1; B=0/2; C=1/2; D=2/3

383

| Taxa                               | 5                                                      | 1<br>0 | 1<br>5 | 2<br>0 | 2<br>5 | 3<br>0 | 3<br>5 | 4<br>0 |
|------------------------------------|--------------------------------------------------------|--------|--------|--------|--------|--------|--------|--------|
| <i>Ankylosphenodon</i>             | ????1?????1????????????????????????????????1?111?1?11  |        |        |        |        |        |        |        |
| <i>Brachyrhinodon</i>              | 211111011100?000000120120?????0011101?10               |        |        |        |        |        |        |        |
| <i>Clevosaurus hudsoni</i>         | 2111111111010001000120210100000011101110               |        |        |        |        |        |        |        |
| <i>Cynosphenodon</i>               | ????????????????????????????????????????1?2112??1?     |        |        |        |        |        |        |        |
| <i>Diphydontosaurus</i>            | 1000000010000100000120100000010100001000               |        |        |        |        |        |        |        |
| <i>Eilenodon</i>                   | ????????????1????????????????????????????1231111202    |        |        |        |        |        |        |        |
| <i>Gephyrosaurus</i>               | 0000000000000110000120000000010100?00000               |        |        |        |        |        |        |        |
| <i>Godavarisaurus</i>              | ??????1?????????????????????????????????0110B????      |        |        |        |        |        |        |        |
| <i>Homoeosaurus cf maximiliani</i> | 11AA?????0??00?0?11?02??1?????A1??1?11                 |        |        |        |        |        |        |        |
| <i>Homoeosaurus maximiliani</i>    | 1A0000011000?0000C11??2001???10111101?11               |        |        |        |        |        |        |        |
| <i>Kallimodon cerinensis</i>       | ????????????????????????1??2010?????A110?1?A?          |        |        |        |        |        |        |        |
| <i>Kallimodon pulchellus</i>       | 01110?011?00?0011211112001???10A11021?10               |        |        |        |        |        |        |        |
| <i>Kawasphenodon expectatus</i>    | ????????????????????????????????????????1?????????     |        |        |        |        |        |        |        |
| <i>Kawasphenodon peligrensis</i>   | ????????????????????????????????????????1?????????     |        |        |        |        |        |        |        |
| <i>Oenosaurus</i>                  | 20????0?1??0?10111????02201????11D?121111              |        |        |        |        |        |        |        |
| <i>Opisthias rarus</i>             | ?????????????????????????????????????????3111??A?      |        |        |        |        |        |        |        |
| <i>Palaeopleurosaurus</i>          | 01110000100010111200202110110100111?1?1A               |        |        |        |        |        |        |        |
| <i>Pamizinsaurus</i>               | ??????1????0????????????????211??0?0?C11?1?11          |        |        |        |        |        |        |        |
| <i>Planocephalosaurus</i>          | 0000000010000110010120200001010111000010               |        |        |        |        |        |        |        |
| <i>Pleurosaurus ginsburgi</i>      | 0110?0001?00?001????0?????????????0?110????            |        |        |        |        |        |        |        |
| <i>Pleurosaurus goldfussi</i>      | 0110?0001100?0011210002C101001020110??00               |        |        |        |        |        |        |        |
| <i>Priosphenodon avelasi</i>       | 0110011111111001111101220100011231111202               |        |        |        |        |        |        |        |
| <i>Pristidactylus</i>              | 1111100001100110001?0001000?000?00?00000               |        |        |        |        |        |        |        |
| <i>Rebbanasaurus</i>               | ????????01??0?????????????????????????????0?3102????   |        |        |        |        |        |        |        |
| <i>Sapheosaurus thiollerei</i>     | 111100?1?0????0011211211001?????0A11021?10             |        |        |        |        |        |        |        |
| <i>Sphenocandor</i>                | ????????????????????????????????????????????1?1?1?1?   |        |        |        |        |        |        |        |
| <i>Sphenodon punctatus</i>         | 1111100111001001111121221110111211121111               |        |        |        |        |        |        |        |
| <i>Sphenovipera</i>                | ????????????????????????????????????????????1?21021??? |        |        |        |        |        |        |        |
| <i>Theretairus</i>                 | ????????????????????????????????????????????1?210????? |        |        |        |        |        |        |        |
| <i>Toxolophosaurus</i>             | ????????????????????????????????????????????1?31111?0? |        |        |        |        |        |        |        |
| <i>Youngina</i>                    | 000000000000000000000200000000?0000?0?000              |        |        |        |        |        |        |        |
| <i>Zapatadon</i>                   | 10?01??01??1??1?1?1?102210101A1?1112??1?               |        |        |        |        |        |        |        |

384

385

386 **Data matrix (continued)**

| Taxa                               | 4<br>5                               | 5<br>0 | 5<br>5 | 6<br>0 | 6<br>5 | 7<br>0 | 7<br>4 |
|------------------------------------|--------------------------------------|--------|--------|--------|--------|--------|--------|
| <i>Ankylosphenodon</i>             | 121?01????0????0?0221??121????0???   |        |        |        |        |        |        |
| <i>Brachyrhinodon</i>              | 121201121101001?????1??1?????????21  |        |        |        |        |        |        |
| <i>Clevosaurus hudsoni</i>         | 121201121201001101211??112??0?0021   |        |        |        |        |        |        |
| <i>Cynosphenodon</i>               | ?2121112110????100?????11210010011   |        |        |        |        |        |        |
| <i>Diphydontosaurus</i>            | 1111200100000000121???000001?0000    |        |        |        |        |        |        |
| <i>Eilenodon</i>                   | 22130122?21210?112?????222????0122   |        |        |        |        |        |        |
| <i>Gephyrosaurus</i>               | 1000200000000000?102??00010??0001    |        |        |        |        |        |        |
| <i>Godavarisaurus</i>              | ?212200C01021??100?????A10010100??   |        |        |        |        |        |        |
| <i>Homoeosaurus cf maximiliani</i> | 121D01A??20C??2?????2??1???????????  |        |        |        |        |        |        |
| <i>Homoeosaurus maximiliani</i>    | 121201A21202??2111222??1??????000?   |        |        |        |        |        |        |
| <i>Kallimodon cerinensis</i>       | 1212??A21202002000221??122????00??   |        |        |        |        |        |        |
| <i>Kallimodon pulchellus</i>       | 121201121202??2001221??122????00??   |        |        |        |        |        |        |
| <i>Kawasphenodon expectatus</i>    | ?212?10?????1??112?????C?????02??    |        |        |        |        |        |        |
| <i>Kawasphenodon peligrensis</i>   | ?21D?10????????112????????????02??   |        |        |        |        |        |        |
| <i>Oenosaurus</i>                  | 12??0?A?????2?02000?????2?2????00?1  |        |        |        |        |        |        |
| <i>Opisthias rarus</i>             | ?212010??20?????112?????122????10??  |        |        |        |        |        |        |
| <i>Palaeopleurosaurus</i>          | 121201121102002101210??022????0001   |        |        |        |        |        |        |
| <i>Pamizinsaurus</i>               | ?2120?A2?102???101?????12???1?????   |        |        |        |        |        |        |
| <i>Planocephalosaurus</i>          | 1212?0A20100001101211??1C00?1?0010   |        |        |        |        |        |        |
| <i>Pleurosaurus ginsburgi</i>      | ?21D0012000??0?110120??022????0000   |        |        |        |        |        |        |
| <i>Pleurosaurus goldfussi</i>      | 121200120002102110?20??022????0000   |        |        |        |        |        |        |
| <i>Priosphenodon avelasi</i>       | 2213012212121031122C2??222????0032   |        |        |        |        |        |        |
| <i>Pristidactylus</i>              | 00002000000??200?111??00010??0001    |        |        |        |        |        |        |
| <i>Rebbanasaurus</i>               | ?212200201001??101?????A11000100??   |        |        |        |        |        |        |
| <i>Sapheosaurus thiollerei</i>     | A????01?21?0???2???221??122????????? |        |        |        |        |        |        |
| <i>Sphenocondor</i>                | 1212200?????????0?0?????0C?010100??  |        |        |        |        |        |        |
| <i>Sphenodon punctatus</i>         | 121211A21102112100012??C2210000011   |        |        |        |        |        |        |
| <i>Sphenovipera</i>                | 1212211?????????112?????1C211??10??  |        |        |        |        |        |        |
| <i>Theretairus</i>                 | ?21221?????????1????????12?10??00??  |        |        |        |        |        |        |
| <i>Toxolophosaurus</i>             | ?213012?????????112?????222????01??  |        |        |        |        |        |        |
| <i>Youngina</i>                    | 0000200000000000?10??00010??0000     |        |        |        |        |        |        |
| <i>Zapatadon</i>                   | ?2120?A??102??2?????????12?????????0 |        |        |        |        |        |        |

387

388

389 **Synapomorphies**

390

391 **Suppl-table 3:** List of common synapomorphies for all MPTs obtained in the  
 392 phylogenetic analysis. Symbols: ch. = character; > = direction of change. See Suppl-fig.  
 393 7 below for node numbers on the strict consensus.

| Node number | Synapomorphies                                                                      |
|-------------|-------------------------------------------------------------------------------------|
| 1           | ch. 9: 0>1 ch. 43: 0>1 ch. 59: 1>2 ch. 67: 1>0                                      |
| 2           | ch. 33: 0>1 ch. 34: 0>1 ch. 39: 0>1 ch. 50: 0>1 ch. 55: 0>1 ch. 56: 0>1 ch. 65: 0>1 |
| 3           | ch. 32: 1>0 ch. 69: 1>0                                                             |
| 4           | ch. 58: 1>0 ch. 68: 0>1                                                             |
| 5           | ch. 8: 0>1 ch. 35: 0>1 ch. 45: 2>0 ch. 46: 0>1 ch. 47: 0>1 ch. 49: 0>1 ch. 66: 0>2  |
| 6           | ch. 5: 0>1 ch. 6: 0>1 ch. 10: 0>1 ch. 73: 0>2                                       |
| 7           | ch. 18: 0>2 ch. 19: 0>1 ch. 55: 1>2 ch. 60: 1>2                                     |
| 8           | ch. 40: 0>1 ch. 50: 1>2                                                             |
| 9           | ch. 16: 0>1 ch. 17: 0>1 ch. 25: 0>1                                                 |
| 10          | ch. 8: 1>0 ch. 20: 1>0 ch. 24: 0>1 ch. 26: 1>0 ch. 61: 12>0 ch. 65: 1>0             |
| 11          | ch. 21: 2>0 ch. 33: 1>0 ch. 46: 1>0 ch. 49: 1>0 ch. 50: 1>0 ch. 57: 0>1 ch. 74: 1>0 |
| 12          | ch. 36: 0>2                                                                         |
| 13          | ch. 35: 1>0 ch. 50: 1>2 ch. 56: 1>0                                                 |
| 14          | ch. 25: 1>0                                                                         |
| 15          | ch. 10: 0>1 ch. 18: 2>1 ch. 24: 0>2 ch. 31: 0>1 ch. 32: 0>2 ch. 40: 0>1             |
| 16          | ch. 57: 0>1 ch. 58: 0>2                                                             |
| 17          | ch. 35: 1>0 ch. 45: 0>2                                                             |
| 18          | ch. 36: 2>1 ch. 47: 1>0                                                             |
| 19          | ch. 72: 0>2                                                                         |
| 20          | ch. 44: 2>3 ch. 47: 0>2 ch. 51: 0>1 ch. 64: 1>2                                     |
| 21          | ch. 72: 0>1                                                                         |

394



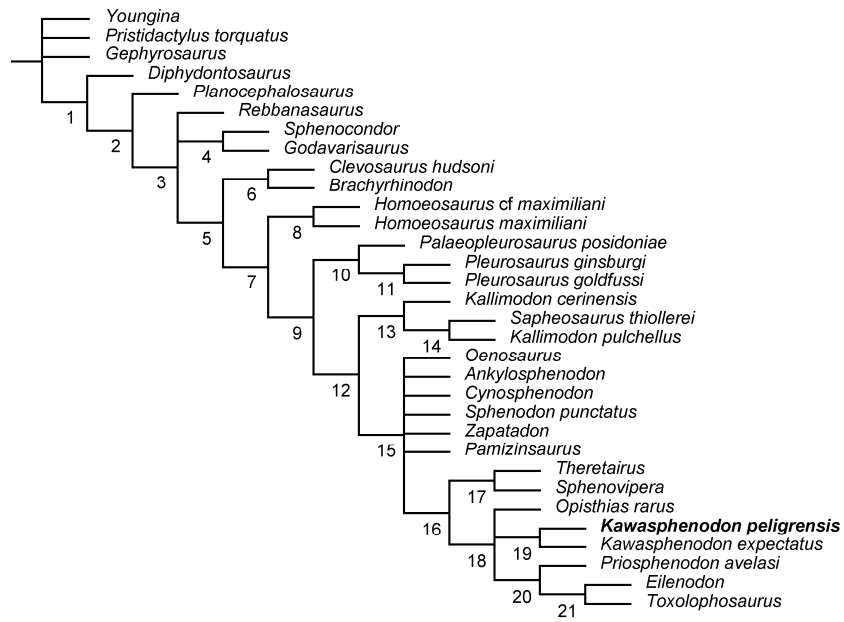

395

396 **Suppl-fig. 7:** Strict consensus of 22 MPTs obtained in the phylogenetic analysis

397 showing node numbers.

398

399 **REFERENCES**

400

401 Andreis RR, Mazzoni MM, Spalletti LA. 1975 Estudio estratigráfico y paleoambiental  
402 de las sedimentitas terciarias entre Pico Salamanca y Bahía Bustamante,  
403 Provincia de Chubut, República Argentina. *Revista de la Asociación Geológica*  
404 *Argentina* **30**, 85–103.

405 Apesteguía S, Carballido JL. in press A new Eilenodontine (Lepidosauria:  
406 Sphenodontidae) from the Lower Cretaceous of Central Patagonia. *J. Vert.*  
407 *Paleontol.* **34**.

408 Apesteguía S, Novas FE. 2003 Large Cretaceous sphenodontian from Patagonia  
409 provides insight into lepidosaur evolution in Gondwana. *Nature* **425**, 609–612.

410 Apesteguía S, Rougier GW. 2007 A late Campanian sphenodontid maxilla from  
411 northern Patagonia. *Am. Mus. Novit.* **3581**, 1–11.

412 Apesteguía S, Gómez RO, Rougier GW. 2012 A basal sphenodontian (Lepidosauria)  
413 from the Jurassic of Patagonia: new insights on the phylogeny and biogeography  
414 of Gondwanan rhynchocephalians. *Zool. J. Linn. Soc.* **166**, 342–360.

415 Benton MJ. 1985 Classification and phylogeny of the diapsid reptiles. *Zool. J. Linn.*  
416 *Soc.* **84**: 97–164.

417 Bonaparte JF, Van Valen LM, Kramarz A. 1993 La fauna local de Punta Peligro,  
418 Paleoceno Inferior, de la Provincia del Chubut, Patagonia, Argentina. *Evol.*  
419 *Monogr.* **14**, 1–61.

420 Coddington J, Scharff N. 1994 Problems with zero-length branches. *Cladistics* **10**, 415–  
421 423.

422 de la Fuente MS, Bona P. 2002 Una nueva especie del género *Hydromedusa* Wagler  
423 (Pleurodira, Chelidae) del Paleógeno de Patagonia. *Ameghiniana* **39**, 77–83.

- 424 Evans SE. 1988 The early history and relationships of the Diapsida. In *The Phylogeny*  
425 *and Classification of the Tetrapods* (ed. M.J. Benton), pp. 221–260. Oxford:  
426 Clarendon Press.
- 427 Feruglio E. 1949 *Descripción Geológica de la Patagonia*, Vol. 1–3. Buenos Aires:  
428 Dirección General de Yacimientos Petroliferos Fiscales.
- 429 Fraser NC, Benton MJ. 1989 The Triassic reptiles *Brachyrhinodon* and *Polysphenodon*  
430 and the relationships of the sphenodontids. *Zool. J. Linn. Soc.* **96**, 413–445.
- 431 Gauthier JA, Estes R, De Queiroz K. 1988. A phylogenetic analysis of the  
432 Lepidosauromorpha. In *Phylogenetic Relationships of the Lizard families:*  
433 *Essays commemorating Charles M. Camp* (eds. R. Estes, G. Pregill), 15–98.  
434 Stanford: Stanford University Press.
- 435 Gelfo JN, Pascual R. 2001 *Peligrotherium tropicalis* (Mammalia, Dryolestida) from the  
436 early Paleocene of Patagonia, a survival from a Mesozoic Gondwanan radiation.  
437 *Geodiversitas* **23**, 369–79.
- 438 Gelfo JN, Goin FJ, Woodburne MO, Muizon CD. 2009 Biochronological relationships  
439 of the earliest South American Paleogene mammalian faunas. *Palaeontology*  
440 **52**, 251–269. doi: 10.1111/j.1475-4983.2008.00835.x
- 441 Gelfo JN, Ortiz-Jaureguizar E, Rougier GW. 2007 New remains and species of the  
442 ‘condylarth’ genus *Escribania* (Mammalia: Didolodontidae) from the  
443 Palaeocene of Patagonia, Argentina. *Earth Environ. Sci. Trans. R. Soc.*  
444 *Edinburgh* **98**, 127–138. doi:10.1017/S1755691007006081.
- 445 Goloboff PA, Farris S, Källersjö M, Oxelmann B, Ramírez M, Szumik C. 2003  
446 Improvements to resampling measures of group support. *Cladistics* **19**, 324–332.
- 447 Goloboff PA, Farris JS, Nixon KC. 2008 TNT, a free program for phylogenetic  
448 analysis. *Cladistics* **24**, 774–786.

449 Gradstein FM, Ogg JG, Schmitz MD, Ogg GM. 2012 *The Geological Time Scale 2012*.  
450 Amsterdam: Elsevier.

451 Hammer O, Harper AT, Ryan PD. 2001 PAST: Paleontological statistics software  
452 package for education and data analysis. *Palaeontologia electronica* **4**, 1–9.

453 Iglesias A, Wilf P, Johnson K, Zamuner A, Cúneo NR, Matheos SD. 2007 A Paleocene  
454 lowland macroflora from Patagonia reveals significantly greater richness than  
455 North American analogs. *Geology* **35**, 947–950.

456 Legarreta L, Uliana MA. 1994 Asociaciones de fósiles y hiatos en el Supracretácico-  
457 Neógeno de Patagonia: una perspectiva estratigráfico-secuencial. *Ameghiniana*  
458 **31**, 257–81.

459 Maddison WP, Maddison DR. 2011 Mesquite: a modular system for evolutionary  
460 analysis. Version 2.75. Available at: <http://mesquiteproject.org>.

461 Marshall LG. 1982 Calibration of the Age of Mammals in South America. In  
462 *Phylogénie et Paléobiogéographie*. (eds. E. Buffetaut, P. Janvier, J.-C. Rage, P.  
463 Tassy). *Geobios, Mémoire Special* **6**, 427–437

464 Marshall LG, Butler R, Drake R, Curtis G. 1981 Calibration of the Beginning of the age  
465 of mammals in Patagonia. *Science* **212**, 43–45.

466 Marshall L, Sempère T, Butler R. 1997 Chronostratigraphy of the Mammal-Bearing  
467 Paleocene of South America. *J. South Am. Earth Sci.* **10**, 49–70.

468 Muizon C. 1998 *Mayulestes ferox*, a borhyaenoid (Metatheria, mammalia) from the  
469 early Paleocene of Bolivia. Phylogenetic and paleobiologic implications.  
470 *Geodiversitas* **20**, 19–142.

471 Páez Arango N. 2008. Dental and Craniomandibular Anatomy of *Peligrotherium*  
472 *tropicalis*: The Evolutionary Radiation of South American Dryolestoid  
473 Mammals. Unpublished Ms Thesis, University of Louisville, 107 pp.

- 474 Pascual R. 1996 Late Cretaceous-Recent land-mammals. An approach to South  
475 American geobiotic evolution. *Mastozool. Neotrop.* **3**, 133–52.
- 476 Pascual R. 1998 The history of South American Land Mammals: the seminal  
477 Cretaceous-Paleocene transition. *Asociación Paleontológica Argentina,*  
478 *Publicación Especial 5 'Paleógeno de América del Sur y de la Península*  
479 *Antártica'*, 9–18.
- 480 Pascual R, Ortiz-Jaureguizar E. 1990 Evolving climates and mammal faunas in  
481 Cenozoic South America. *Journal of Human Evolution* **19**, 23–60.
- 482 Pascual R, Ortiz-Jaureguizar E. 1991 El Ciclo Faunístico Cochabambiano (Paleoceno  
483 temprano): su incidencia en la historia biogeográfica de los mamíferos  
484 neotropicales. In *Fósiles y Facies de Bolivia. Revista Técnica de Y.P.F. de*  
485 *Bolivia* **12** (3–4) (ed. R. Suárez Soruco), pp. 559–574.
- 486 Pascual R, Archer M, Ortiz Jaureguizar E, Prado JL, Godthelp H, Hand S. 1992 First  
487 discovery of monotremes in South America. *Nature* **356**, 704–706.
- 488 Rauhut OWM, Heyng AM, López-Arbarello A, Hecker A. 2012 A new  
489 rhynchocephalian from the Late Jurassic of Germany with a dentition that is  
490 unique amongst tetrapods. *PLoS ONE* **10**, e46839.
- 491 Reynoso VH. 1996 A Middle Jurassic *Sphenodon*-like sphenodontian  
492 (Diapsida:Lepidosauria) from Huizachal Canyon, Tamaulipas, México. *J. Vert.*  
493 *Paleontol.* **16**, 210–221.
- 494 Reynoso VH. 1997 A “beaded” sphenodontian (Diapsida: Lepidosauria) from the Early  
495 Cretaceous of central Mexico. *J. Vert. Paleontol.* **17**, 52–59.
- 496 Reynoso VH. 2005 Possible evidence of a venom apparatus in a Middle Jurassic  
497 sphenodontian from the huizachal red beds of Tamaulipas, Mexico. *J. Vert.*  
498 *Paleontol.* **25**, 646–654.

- 499 Reynoso VH, Clark JM. 1998 A dwarf sphenodontian from the Jurassic La Boca  
500 Formation of Tamaulipas, México. *J. Vert. Paleontol.* **18**, 333–339.
- 501 Somoza R, Cladera G, Archangelsky S. 1995 Una nueva taoflora paleocena de Chubut,  
502 Patagonia. Su edad y ambiente de depositación. *VI Congreso Argentino de*  
503 *Paleontología y Bioestratigrafía, Actas, Trelew*, 265–269.
- 504 Sues H-D, Shubin NH, Olsen PE. 1994 A new sphenodontian (Lepidosauria:  
505 Rhynchocephalia) from the McCoy Brook Formation (Lower Jurassic) of Nova  
506 Scotia, Canada. *J. Vert. Paleontol.* **14**, 327–340.
- 507 Wiens JJ, Brandley MC, Reeder TW. 2006 Why does a trait evolve multiple times  
508 within a clade? Repeated evolution of snakeline body form in squamate reptiles.  
509 *Evolution* **60**, 123–141.
- 510 Wu X-C. 1994 Late Triassic–Early Jurassic sphenodontians (*Clevosaurus*) from China  
511 and the Phylogeny of the Sphenodontida. In *In the shadow of the dinosaurs:*  
512 *Early Mesozoic tetrapods* (eds. N.C. Fraser, H.-D. Sues), pp. 38–69. Cambridge:  
513 Cambridge University Press.
